# Supplementary material for: Maternal Metabolome in Pregnancy and Childhood Asthma or Recurrent Wheeze in the Vitamin D Antenatal Asthma Reduction Trial
Source: MDPI journal article supplement (doi:10.3390/metabo11020065), 2021-01-23
Supplement: s1 [file s1]

**Title:** Maternal Metabolome in Pregnancy and Childhood Asthma or Recurrent Wheeze in the Vitamin D Antenatal Asthma Reduction Trial

**Author Names:** Mengna Huang, Rachel S. Kelly, Su H. Chu, Priyadarshini Kachroo, Gözde Gürdeniz, Bo L. Chawes, Hans Bisgaard, Scott T. Weiss, Jessica Lasky-Su

## Supplementary Tables and Figures

### Contents

|                                                                                                                                                                                                                                                                                       |    |
|---------------------------------------------------------------------------------------------------------------------------------------------------------------------------------------------------------------------------------------------------------------------------------------|----|
| Supplementary Figure S1. Study sample flowchart.....                                                                                                                                                                                                                                  | 2  |
| Supplementary Figure S2. Schematic of main analyses results for the relation between maternal pregnancy metabolomes at two time points and child asthma or recurrent wheeze status by age three .....                                                                                 | 3  |
| Supplementary Table S1. Maternal baseline (10–18 weeks gestation) metabolites with <i>p</i> -values < 0.05 for their associations with child asthma/recurrent wheeze status by age 3 in VDAART (sorted by <i>p</i> -values) .....                                                     | 4  |
| Supplementary Table S2. Maternal third trimester (32–38 weeks gestation) metabolites with <i>p</i> -values < 0.05 for their associations with child asthma/recurrent wheeze status by age 3 in VDAART (sorted by <i>p</i> -values) .....                                              | 5  |
| Supplementary Table S3. Maternal baseline (10–18 weeks gestation) metabolites with <i>p</i> -values < 0.05 for their associations with child asthma/recurrent wheeze status by age 3 in girls in VDAART (sorted by <i>p</i> -values) .....                                            | 8  |
| Supplementary Table S4. Maternal baseline (10–18 weeks gestation) metabolites with <i>p</i> -values < 0.05 for their associations with child asthma/recurrent wheeze status by age 3 in boys in VDAART (sorted by <i>p</i> -values).....                                              | 10 |
| Supplementary Table S5. Maternal third trimester (32–38 weeks gestation) metabolites with <i>p</i> -values < 0.05 for their associations with child asthma/recurrent wheeze status by age 3 in girls in VDAART (sorted by <i>p</i> -values) .....                                     | 12 |
| Supplementary Table S6. Maternal third trimester (32–38 weeks gestation) metabolites with <i>p</i> -values < 0.05 for their associations with child asthma/recurrent wheeze status by age 3 in boys in VDAART (sorted by <i>p</i> -values).....                                       | 15 |
| Supplementary Table S7. Maternal baseline (10–18 weeks gestation) metabolites with <i>p</i> -values < 0.05 for their interaction with child sex in association with child asthma/recurrent wheeze status by age 3 in VDAART (sorted by interaction term <i>p</i> -values).....        | 18 |
| Supplementary Table S8. Maternal third trimester (32–38 weeks gestation) metabolites with <i>p</i> -values < 0.05 for their interaction with child sex in association with child asthma/recurrent wheeze status by age 3 in VDAART (sorted by interaction term <i>p</i> -values)..... | 20 |
| Metabolomic profiling in the Vitamin D Antenatal Asthma Reduction Trial (VDAART).....                                                                                                                                                                                                 | 22 |

**Supplementary Figure S1.** Study sample flowchart

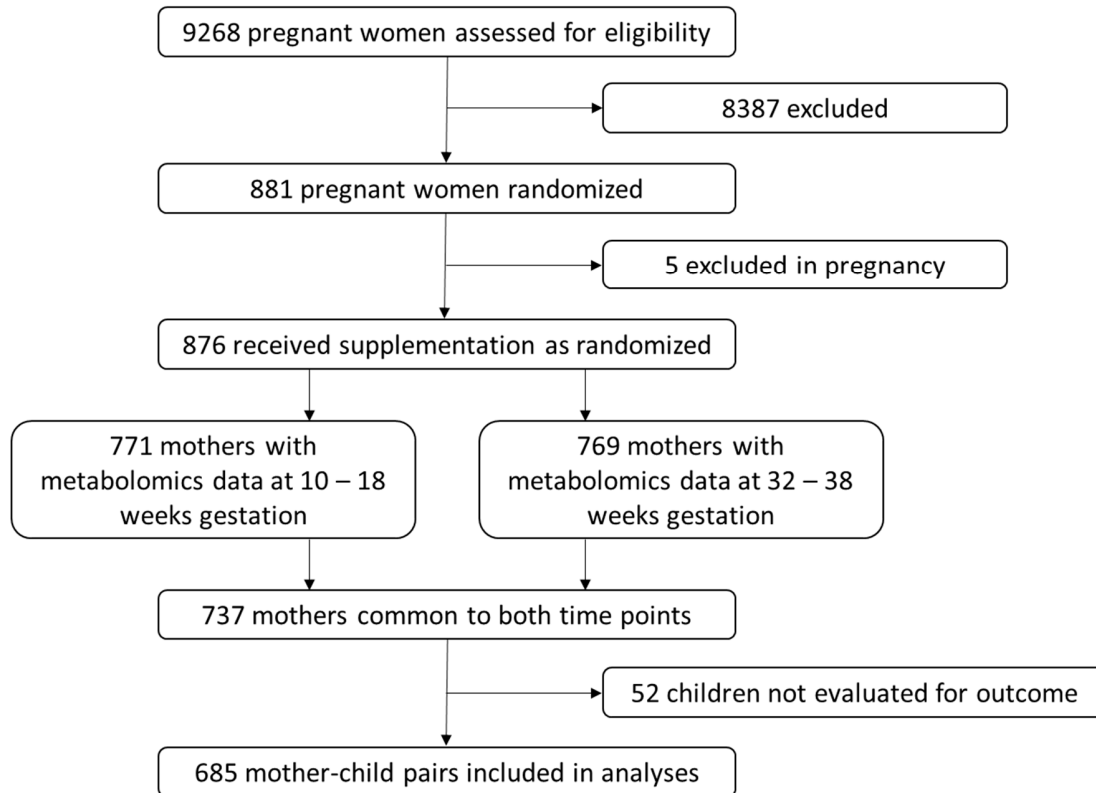

**Supplementary Figure S2.** Schematic of main analyses results for the relation between maternal pregnancy metabolomes at two time points and child asthma or recurrent wheeze status by age three

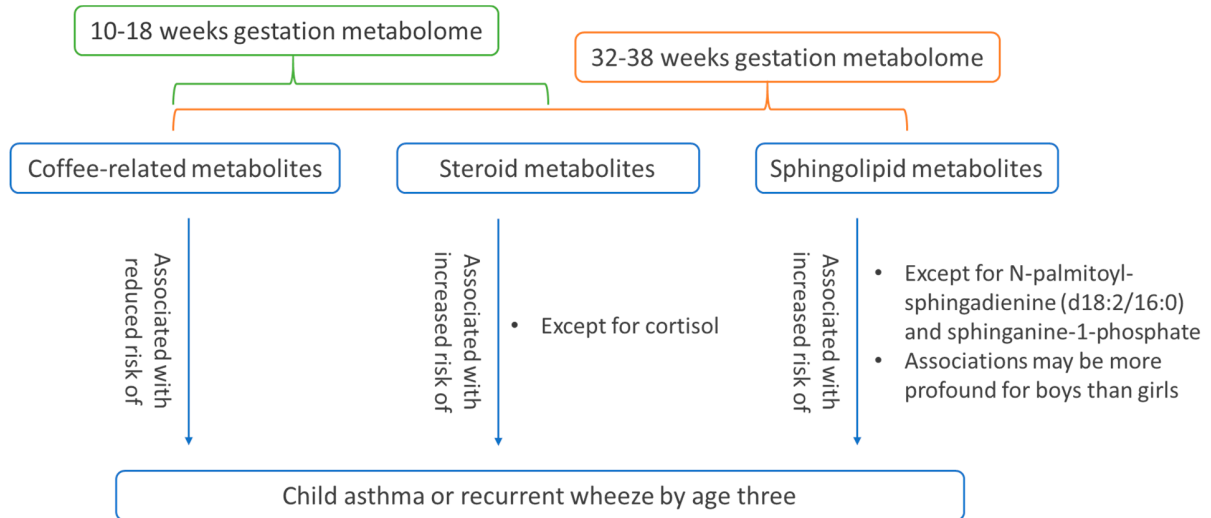

**Supplementary Table S1.** Maternal baseline (10–18 weeks gestation) metabolites with *p*-values < 0.05 for their associations with child asthma/recurrent wheeze status by age 3 in VDAART (sorted by *p*-values)

| Metabolite                                          | Sub-pathway                                  | Super-pathway          | Beta estimate | p-value  | Odds ratio | 95% CI lower bound | 95% CI upper bound |
|-----------------------------------------------------|----------------------------------------------|------------------------|---------------|----------|------------|--------------------|--------------------|
| 2-aminoadipate                                      | Lysine Metabolism                            | Amino Acid             | 0.61          | 5.24E-05 | 1.84       | 1.37               | 2.47               |
| pregnenetriol sulfate*                              | Pregnenolone Steroids                        | Lipid                  | 0.47          | 2.27E-02 | 1.60       | 1.07               | 2.40               |
| pregnenolone sulfate                                | Pregnenolone Steroids                        | Lipid                  | 0.48          | 2.40E-02 | 1.62       | 1.07               | 2.45               |
| 1-linoleoyl-2-arachidonoyl-GPC (18:2/20:4n6)*       | Phosphatidylcholine (PC)                     | Lipid                  | 0.58          | 2.68E-02 | 1.79       | 1.07               | 2.99               |
| theophylline                                        | Xanthine Metabolism                          | Xenobiotics            | -0.24         | 2.72E-02 | 0.79       | 0.64               | 0.97               |
| quininate                                           | Food Component/Plant                         | Xenobiotics            | -0.24         | 2.77E-02 | 0.79       | 0.64               | 0.97               |
| thyroxine                                           | Tyrosine Metabolism                          | Amino Acid             | 0.74          | 3.21E-02 | 2.10       | 1.07               | 4.12               |
| sphingomyelin (d18:2/24:1, d18:1/24:2)*             | Sphingomyelins                               | Lipid                  | 0.70          | 3.25E-02 | 2.01       | 1.06               | 3.79               |
| propionylglycine (C3)                               | Fatty Acid Metabolism (also BCAA Metabolism) | Lipid                  | 0.37          | 3.42E-02 | 1.45       | 1.03               | 2.04               |
| 3-hydroxypyridine sulfate                           | Chemical                                     | Xenobiotics            | -0.25         | 3.57E-02 | 0.78       | 0.61               | 0.98               |
| pregnenediol sulfate (C21H34O5S)*                   | Pregnenolone Steroids                        | Lipid                  | 0.46          | 3.75E-02 | 1.58       | 1.03               | 2.43               |
| 1-palmitoyl-2-arachidonoyl-GPI (16:0/20:4)*         | Phosphatidylinositol (PI)                    | Lipid                  | 0.47          | 3.85E-02 | 1.60       | 1.03               | 2.51               |
| caffeine                                            | Xanthine Metabolism                          | Xenobiotics            | -0.20         | 3.88E-02 | 0.82       | 0.68               | 0.99               |
| 1-(1-enyl-palmitoyl)-2-linoleoyl-GPC (P-16:0/18:2)* | Plasmalogen                                  | Lipid                  | 0.56          | 4.19E-02 | 1.75       | 1.02               | 2.98               |
| propyl 4-hydroxybenzoate sulfate                    | Benzoate Metabolism                          | Xenobiotics            | -0.20         | 4.30E-02 | 0.82       | 0.67               | 0.99               |
| dehydroepiandrosterone sulfate (DHEA-S)             | Androgenic Steroids                          | Lipid                  | 0.37          | 4.63E-02 | 1.44       | 1.01               | 2.07               |
| androstenediol (3alpha, 17alpha) monosulfate        | Androgenic Steroids                          | Lipid                  | 0.32          | 4.68E-02 | 1.38       | 1.00               | 1.89               |
| beta-cryptoxanthin                                  | Vitamin A Metabolism                         | Cofactors and Vitamins | 0.34          | 4.76E-02 | 1.41       | 1.00               | 1.98               |
| carotene diol                                       | Vitamin A Metabolism                         | Cofactors and Vitamins | 0.43          | 4.94E-02 | 1.54       | 1.00               | 2.38               |

\*: indicates a compound that has not been confirmed based on a standard, but we are confident in its identity.

Abbreviations: BCAA, branched chain amino acid; VDAART, Vitamin D Antenatal Asthma Reduction Trial.

**Supplementary Table S2.** Maternal third trimester (32–38 weeks gestation) metabolites with *p*-values < 0.05 for their associations with child asthma/recurrent wheeze status by age 3 in VDAART (sorted by *p*-values)

| Metabolite                                      | Sub-pathway                                       | Super-pathway          | Beta estimate | p-value  | Odds ratio | 95% CI lower bound | 95% CI upper bound |
|-------------------------------------------------|---------------------------------------------------|------------------------|---------------|----------|------------|--------------------|--------------------|
| N-palmitoylglycine sulfate*                     | Fatty Acid Metabolism (Acyl Glycine)              | Lipid                  | 0.70          | 2.10E-04 | 2.01       | 1.39               | 2.91               |
| palmitoyl sphingomyelin (d18:1/16:0)            | Chemical                                          | Xenobiotics            | 1.06          | 1.02E-03 | 2.87       | 1.53               | 5.39               |
| sphingomyelin (d18:2/24:2)*                     | Sphingomyelins                                    | Lipid                  | 1.22          | 1.59E-03 | 3.38       | 1.59               | 7.18               |
| 3-hydroxyhexanoate                              | Sphingomyelins                                    | Lipid                  | 0.89          | 3.39E-03 | 2.43       | 1.34               | 4.40               |
| hexanoylglutamine                               | Fatty Acid, Monohydroxy                           | Lipid                  | 0.57          | 3.65E-03 | 1.77       | 1.20               | 2.59               |
| diacylglycerol (16:1/18:2 [2], 16:0/18:3 [1])*  | Fatty Acid Metabolism (Acyl Glutamine)            | Lipid                  | 0.36          | 4.24E-03 | 1.43       | 1.12               | 1.82               |
| mannose                                         | Diacylglycerol                                    | Lipid                  | -0.34         | 4.43E-03 | 0.71       | 0.56               | 0.90               |
| pregnenetriol disulfate*                        | Fructose, Mannose and Galactose Metabolism        | Carbohydrate           | 0.31          | 5.04E-03 | 1.36       | 1.10               | 1.68               |
| 2-hydroxystearate                               | Pregnenolone Steroids                             | Lipid                  | 0.51          | 5.37E-03 | 1.67       | 1.16               | 2.40               |
| sphingomyelin (d18:2/16:0, d18:1/16:1)*         | Fatty Acid, Monohydroxy                           | Lipid                  | 0.61          | 8.59E-03 | 1.83       | 1.17               | 2.88               |
| O-sulfo-L-tyrosine                              | Sphingomyelins                                    | Lipid                  | 0.86          | 8.90E-03 | 2.37       | 1.24               | 4.53               |
| cis-4-decenoate (10:1n6)*                       | Chemical                                          | Xenobiotics            | 0.61          | 1.09E-02 | 1.84       | 1.15               | 2.96               |
| 2-hydroxypalmitate                              | Medium Chain Fatty Acid                           | Lipid                  | 0.43          | 1.15E-02 | 1.54       | 1.10               | 2.16               |
| lignoceroyl sphingomyelin (d18:1/24:0)          | Fatty Acid, Monohydroxy                           | Lipid                  | 0.59          | 1.16E-02 | 1.80       | 1.14               | 2.84               |
| 16a-hydroxy DHEA 3-sulfate                      | Sphingomyelins                                    | Lipid                  | 0.72          | 1.19E-02 | 2.06       | 1.17               | 3.61               |
| octadecanedioate (C18)                          | Androgenic Steroids                               | Lipid                  | 0.48          | 1.25E-02 | 1.62       | 1.11               | 2.36               |
| gulonate*                                       | Fatty Acid, Dicarboxylate                         | Lipid                  | 0.48          | 1.28E-02 | 1.62       | 1.11               | 2.36               |
| cortisol                                        | Ascorbate and Aldarate Metabolism                 | Cofactors and Vitamins | -0.27         | 1.34E-02 | 0.76       | 0.61               | 0.95               |
| linoleate (18:2n6)                              | Corticosteroids                                   | Lipid                  | -0.55         | 1.38E-02 | 0.58       | 0.37               | 0.89               |
| hydroxypalmitoyl sphingomyelin (d18:1/16:0(OH)) | Long Chain Polyunsaturated Fatty Acid (n3 and n6) | Lipid                  | 0.41          | 1.44E-02 | 1.51       | 1.09               | 2.10               |
|                                                 | Sphingomyelins                                    | Lipid                  | 0.68          | 1.55E-02 | 1.98       | 1.14               | 3.43               |

| Metabolite                                             | Sub-pathway                                          | Super-pathway          | Beta estimate | p-value  | Odds ratio | 95% CI lower bound | 95% CI upper bound |
|--------------------------------------------------------|------------------------------------------------------|------------------------|---------------|----------|------------|--------------------|--------------------|
| 3-phosphoglycerate                                     | Glycolysis, Gluconeogenesis, and Pyruvate Metabolism | Carbohydrate           | -0.42         | 1.68E-02 | 0.66       | 0.47               | 0.93               |
| glucose                                                | Glycolysis, Gluconeogenesis, and Pyruvate Metabolism | Carbohydrate           | 0.26          | 1.73E-02 | 1.30       | 1.05               | 1.60               |
| oleate/vaccenate (18:1)                                | Long Chain Monounsaturated Fatty Acid                | Lipid                  | 0.39          | 1.84E-02 | 1.48       | 1.07               | 2.05               |
| 1-linoleoyl-GPI* (18:2)*                               | Lysophospholipid                                     | Lipid                  | 0.42          | 2.13E-02 | 1.53       | 1.06               | 2.19               |
| thyroxine                                              | Tyrosine Metabolism                                  | Amino Acid             | 0.65          | 2.26E-02 | 1.91       | 1.10               | 3.33               |
| 2-hydroxybehenate                                      | Fatty Acid, Monohydroxy                              | Lipid                  | 0.53          | 2.33E-02 | 1.71       | 1.08               | 2.71               |
| pseudouridine                                          | Pyrimidine Metabolism, Uracil containing             | Nucleotide             | 0.75          | 2.37E-02 | 2.11       | 1.10               | 4.03               |
| cys-gly, oxidized                                      | Glutathione Metabolism                               | Amino Acid             | -0.41         | 2.56E-02 | 0.67       | 0.47               | 0.95               |
| sphingomyelin (d18:2/24:1, d18:1/24:2)*                | Sphingomyelins                                       | Lipid                  | 0.75          | 2.57E-02 | 2.12       | 1.10               | 4.09               |
| dihomolinoleate (20:2n6)                               | Long Chain Polyunsaturated Fatty Acid (n3 and n6)    | Lipid                  | 0.41          | 2.65E-02 | 1.51       | 1.05               | 2.18               |
| N-acetylaspartate (NAA)                                | Alanine and Aspartate Metabolism                     | Amino Acid             | 0.50          | 2.78E-02 | 1.65       | 1.06               | 2.57               |
| pregnen-diol disulfate*                                | Pregnenolone Steroids                                | Lipid                  | 0.46          | 2.89E-02 | 1.59       | 1.05               | 2.41               |
| sphinganine-1-phosphate                                | Sphingolipid Synthesis                               | Lipid                  | -0.46         | 2.89E-02 | 0.63       | 0.42               | 0.95               |
| methylsuccinate                                        | Leucine, Isoleucine and Valine Metabolism            | Amino Acid             | -0.37         | 2.96E-02 | 0.69       | 0.49               | 0.96               |
| 1-(1-enyl-palmitoyl)-2-palmitoleoyl-GPC (P-16:0/16:1)* | Plasmalogen                                          | Lipid                  | 0.59          | 2.98E-02 | 1.81       | 1.06               | 3.10               |
| 2-oxoarginine*                                         | Urea cycle; Arginine and Proline Metabolism          | Amino Acid             | -0.40         | 3.04E-02 | 0.67       | 0.47               | 0.96               |
| 3-methoxytyrosine                                      | Tyrosine Metabolism                                  | Amino Acid             | -0.58         | 3.06E-02 | 0.56       | 0.33               | 0.95               |
| 5-methylthioadenosine (MTA)                            | Polyamine Metabolism                                 | Amino Acid             | 0.35          | 3.10E-02 | 1.43       | 1.03               | 1.97               |
| 5,6-dihydrouridine                                     | Pyrimidine Metabolism, Uracil containing             | Nucleotide             | 0.67          | 3.10E-02 | 1.95       | 1.06               | 3.57               |
| sphingomyelin (d18:1/24:1, d18:2/24:0)*                | Sphingomyelins                                       | Lipid                  | 0.71          | 3.20E-02 | 2.03       | 1.06               | 3.87               |
| oxalate (ethanedioate)                                 | Ascorbate and Aldarate Metabolism                    | Cofactors and Vitamins | 0.55          | 3.21E-02 | 1.74       | 1.05               | 2.88               |

| Metabolite                                          | Sub-pathway                            | Super-pathway          | Beta estimate | p-value  | Odds ratio | 95% CI lower bound | 95% CI upper bound |
|-----------------------------------------------------|----------------------------------------|------------------------|---------------|----------|------------|--------------------|--------------------|
| eicosanedioate (C20-DC)                             | Fatty Acid, Dicarboxylate              | Lipid                  | 0.42          | 3.29E-02 | 1.53       | 1.04               | 2.25               |
| salicylate                                          | Drug - Topical Agents                  | Xenobiotics            | -0.32         | 3.32E-02 | 0.73       | 0.54               | 0.98               |
| 1-methylnicotinamide                                | Nicotinate and Nicotinamide Metabolism | Cofactors and Vitamins | -0.40         | 3.49E-02 | 0.67       | 0.46               | 0.97               |
| stearate (18:0)                                     | Long Chain Saturated Fatty Acid        | Lipid                  | 0.45          | 3.68E-02 | 1.57       | 1.03               | 2.41               |
| 2-aminophenol sulfate                               | Food Component/Plant                   | Xenobiotics            | -0.29         | 3.68E-02 | 0.75       | 0.57               | 0.98               |
| N-palmitoyl-sphingadienine (d18:2/16:0)*            | Ceramides                              | Lipid                  | -0.30         | 3.72E-02 | 0.74       | 0.56               | 0.98               |
| 1-arachidonoyl-GPI* (20:4)*                         | Lysophospholipid                       | Lipid                  | 0.42          | 3.76E-02 | 1.52       | 1.02               | 2.27               |
| choline                                             | Phospholipid Metabolism                | Lipid                  | -0.71         | 3.95E-02 | 0.49       | 0.25               | 0.97               |
| dodecadienoate (12:2)*                              | Fatty Acid, Dicarboxylate              | Lipid                  | 0.36          | 4.05E-02 | 1.43       | 1.02               | 2.02               |
| pipecolate                                          | Lysine Metabolism                      | Amino Acid             | -0.42         | 4.10E-02 | 0.66       | 0.44               | 0.98               |
| bilirubin (E,E)*                                    | Hemoglobin and Porphyrin Metabolism    | Cofactors and Vitamins | 0.31          | 4.13E-02 | 1.36       | 1.01               | 1.83               |
| 1-linoleoyl-GPC (18:2)                              | Lysophospholipid                       | Lipid                  | 0.44          | 4.23E-02 | 1.55       | 1.02               | 2.37               |
| trigonelline (N'-methylnicotinate)                  | Nicotinate and Nicotinamide Metabolism | Cofactors and Vitamins | -0.33         | 4.26E-02 | 0.72       | 0.53               | 0.99               |
| sphingomyelin (d18:1/20:2, d18:2/20:1, d16:1/22:2)* | Sphingomyelins                         | Lipid                  | 0.53          | 4.31E-02 | 1.70       | 1.02               | 2.84               |
| cysteinylglycine disulfide*                         | Glutathione Metabolism                 | Amino Acid             | -0.51         | 4.32E-02 | 0.60       | 0.37               | 0.98               |
| succinylcarnitine (C4-DC)                           | TCA Cycle                              | Energy                 | -0.53         | 4.51E-02 | 0.59       | 0.35               | 0.99               |
| quininate                                           | Food Component/Plant                   | Xenobiotics            | -0.21         | 4.57E-02 | 0.81       | 0.65               | 1.00               |
| 3-hydroxypyridine sulfate                           | Chemical                               | Xenobiotics            | -0.23         | 4.62E-02 | 0.80       | 0.64               | 1.00               |
| 3-hydroxybutyrate (BHBA)                            | Ketone Bodies                          | Lipid                  | 0.28          | 4.72E-02 | 1.32       | 1.00               | 1.75               |
| AMP                                                 | Purine Metabolism, Adenine containing  | Nucleotide             | -0.38         | 4.97E-02 | 0.69       | 0.47               | 1.00               |

\*: indicates a compound that has not been confirmed based on a standard, but we are confident in its identity.

Abbreviations: VDAART, Vitamin D Antenatal Asthma Reduction Trial.

**Supplementary Table S3.** Maternal baseline (10–18 weeks gestation) metabolites with *p*-values < 0.05 for their associations with child asthma/recurrent wheeze status by age 3 in girls in VDAART (sorted by *p*-values)

| Metabolite                                          | Sub-pathway                                 | Super-pathway | Beta estimate | p-value  | Odds ratio | 95% CI lower bound | 95% CI upper bound |
|-----------------------------------------------------|---------------------------------------------|---------------|---------------|----------|------------|--------------------|--------------------|
| 2-aminoadipate                                      | Lysine Metabolism                           | Amino Acid    | 0.81          | 1.94E-03 | 2.25       | 1.35               | 3.75               |
| theobromine                                         | Xanthine Metabolism                         | Xenobiotics   | -0.41         | 2.44E-03 | 0.66       | 0.51               | 0.87               |
| 1-(1-enyl-palmitoyl)-2-linoleoyl-GPC (P-16:0/18:2)* | Plasmalogen                                 | Lipid         | 1.34          | 3.46E-03 | 3.82       | 1.56               | 9.38               |
| isoursodeoxycholate                                 | Secondary Bile Acid Metabolism              | Lipid         | 0.59          | 6.17E-03 | 1.81       | 1.18               | 2.76               |
| 3-methylxanthine                                    | Xanthine Metabolism                         | Xenobiotics   | -0.56         | 7.45E-03 | 0.57       | 0.38               | 0.86               |
| theophylline                                        | Xanthine Metabolism                         | Xenobiotics   | -0.46         | 7.87E-03 | 0.63       | 0.45               | 0.89               |
| glycolithocholate sulfate*                          | Secondary Bile Acid Metabolism              | Lipid         | 0.62          | 1.44E-02 | 1.86       | 1.13               | 3.06               |
| pregnenolone sulfate                                | Pregnenolone Steroids                       | Lipid         | 0.83          | 1.45E-02 | 2.30       | 1.18               | 4.48               |
| glyco-beta-muricholate                              | Primary Bile Acid Metabolism                | Lipid         | 0.50          | 1.59E-02 | 1.65       | 1.10               | 2.48               |
| hexadecenedioate (C16:1-DC)*                        | Fatty Acid, Dicarboxylate                   | Lipid         | 0.68          | 1.61E-02 | 1.97       | 1.13               | 3.43               |
| octadecenedioate (C18:1-DC)*                        | Fatty Acid, Dicarboxylate                   | Lipid         | 0.68          | 1.76E-02 | 1.98       | 1.13               | 3.49               |
| thyroxine                                           | Tyrosine Metabolism                         | Amino Acid    | 1.37          | 1.86E-02 | 3.92       | 1.26               | 12.25              |
| caffeine                                            | Xanthine Metabolism                         | Xenobiotics   | -0.37         | 1.86E-02 | 0.69       | 0.51               | 0.94               |
| androstenediol (3alpha, 17alpha) monosulfate (2)    | Androgenic Steroids                         | Lipid         | 0.65          | 1.87E-02 | 1.91       | 1.11               | 3.28               |
| 1,2-dilinoleoyl-GPC (18:2/18:2)                     | Phosphatidylcholine (PC)                    | Lipid         | 0.88          | 2.02E-02 | 2.40       | 1.15               | 5.02               |
| 17alpha-hydroxypregnanolone glucuronide             | Pregnenolone Steroids                       | Lipid         | -0.62         | 2.10E-02 | 0.54       | 0.32               | 0.91               |
| p-cresol sulfate                                    | Benzoate Metabolism                         | Xenobiotics   | 0.62          | 2.12E-02 | 1.86       | 1.10               | 3.15               |
| 1-palmitoylglycerol (16:0)                          | Monoacylglycerol                            | Lipid         | -0.45         | 2.19E-02 | 0.64       | 0.44               | 0.94               |
| 1-(1-enyl-palmitoyl)-GPC (P-16:0)*                  | Lysoplasmalogen                             | Lipid         | 0.76          | 2.31E-02 | 2.15       | 1.11               | 4.15               |
| N-oleoylserine                                      | Endocannabinoid                             | Lipid         | 0.72          | 2.98E-02 | 2.06       | 1.07               | 3.95               |
| 3-amino-2-piperidone                                | Urea cycle; Arginine and Proline Metabolism | Amino Acid    | 0.68          | 3.00E-02 | 1.98       | 1.07               | 3.66               |
| p-cresol glucuronide*                               | Tyrosine Metabolism                         | Amino Acid    | 0.40          | 3.02E-02 | 1.50       | 1.04               | 2.16               |



| <b>Metabolite</b>                                  | <b>Sub-pathway</b>                          | <b>Super-pathway</b> | <b>Beta estimate</b> | <b>p-value</b> | <b>Odds ratio</b> | <b>95% CI lower bound</b> | <b>95% CI upper bound</b> |
|----------------------------------------------------|---------------------------------------------|----------------------|----------------------|----------------|-------------------|---------------------------|---------------------------|
| thioprolin                                         | Chemical                                    | Xenobiotics          | -0.95                | 3.72E-02       | 0.39              | 0.16                      | 0.95                      |
| hydroxy-N6,N6,N6-trimethyllysine*                  | Lysine Metabolism                           | Amino Acid           | -0.57                | 3.81E-02       | 0.57              | 0.33                      | 0.97                      |
| homocitrullin                                      | Urea cycle; Arginine and Proline Metabolism | Amino Acid           | 0.59                 | 3.85E-02       | 1.80              | 1.03                      | 3.15                      |
| 6-oxopiperidine-2-carboxylate                      | Lysine Metabolism                           | Amino Acid           | 0.71                 | 3.91E-02       | 2.03              | 1.04                      | 3.96                      |
| 7-methylguanin                                     | Purine Metabolism, Guanine containing       | Nucleotide           | -0.67                | 4.31E-02       | 0.51              | 0.27                      | 0.98                      |
| quinat                                             | Food Component/Plant                        | Xenobiotics          | -0.34                | 4.32E-02       | 0.71              | 0.51                      | 0.99                      |
| 3beta-hydroxy-5-cholestenoate                      | Sterol                                      | Lipid                | 0.76                 | 4.38E-02       | 2.13              | 1.02                      | 4.44                      |
| 1-(1-enyl-stearoyl)-2-linoleoyl-GPE (P-18:0/18:2)* | Plasmalogen                                 | Lipid                | 0.67                 | 4.59E-02       | 1.96              | 1.01                      | 3.79                      |
| 1,7-dimethylurat                                   | Xanthine Metabolism                         | Xenobiotics          | -0.35                | 4.59E-02       | 0.70              | 0.50                      | 0.99                      |
| deoxycholate                                       | Secondary Bile Acid Metabolism              | Lipid                | 0.44                 | 4.70E-02       | 1.56              | 1.01                      | 2.41                      |

\*: indicates a compound that has not been confirmed based on a standard, but we are confident in its identity.

Abbreviations: VDAART, Vitamin D Antenatal Asthma Reduction Trial.

**Supplementary Table S4.** Maternal baseline (10–18 weeks gestation) metabolites with *p*-values < 0.05 for their associations with child asthma/recurrent wheeze status by age 3 in boys in VDAART (sorted by *p*-values)

| Metabolite                                  | Sub-pathway                              | Super-pathway          | Beta estimate | p-value  | Odds ratio | 95% CI lower bound | 95% CI upper bound |
|---------------------------------------------|------------------------------------------|------------------------|---------------|----------|------------|--------------------|--------------------|
| 12,13-DiHOME                                | Fatty Acid, Dihydroxy                    | Lipid                  | -0.57         | 4.48E-03 | 0.56       | 0.38               | 0.84               |
| 2-aminoadipate                              | Lysine Metabolism                        | Amino Acid             | 0.50          | 9.03E-03 | 1.65       | 1.13               | 2.40               |
| kynurenine                                  | Tryptophan Metabolism                    | Amino Acid             | 1.06          | 1.07E-02 | 2.89       | 1.28               | 6.52               |
| 3-hydroxypyridine sulfate                   | Chemical                                 | Xenobiotics            | -0.40         | 1.61E-02 | 0.67       | 0.49               | 0.93               |
| guaiacol sulfate                            | Benzoate Metabolism                      | Xenobiotics            | -0.57         | 1.69E-02 | 0.57       | 0.36               | 0.90               |
| thioprolin                                  | Chemical                                 | Xenobiotics            | 0.96          | 1.93E-02 | 2.61       | 1.17               | 5.83               |
| catechol sulfate                            | Benzoate Metabolism                      | Xenobiotics            | -0.59         | 1.94E-02 | 0.56       | 0.34               | 0.91               |
| 3-methyl catechol sulfate (1)               | Benzoate Metabolism                      | Xenobiotics            | -0.33         | 2.07E-02 | 0.72       | 0.55               | 0.95               |
| 9,10-DiHOME                                 | Fatty Acid, Dihydroxy                    | Lipid                  | -0.44         | 2.21E-02 | 0.64       | 0.44               | 0.94               |
| cysteine-glutathione disulfide              | Glutathione Metabolism                   | Amino Acid             | 0.38          | 2.67E-02 | 1.46       | 1.04               | 2.04               |
| maltotriose                                 | Glycogen Metabolism                      | Carbohydrate           | 0.29          | 3.09E-02 | 1.34       | 1.03               | 1.74               |
| pseudouridine                               | Pyrimidine Metabolism, Uracil containing | Nucleotide             | 1.00          | 3.12E-02 | 2.73       | 1.09               | 6.78               |
| gamma-glutamylglutamine                     | Gamma-glutamyl Amino Acid                | Peptide                | 0.61          | 3.38E-02 | 1.84       | 1.05               | 3.22               |
| maltose                                     | Glycogen Metabolism                      | Carbohydrate           | 0.33          | 3.42E-02 | 1.40       | 1.03               | 1.91               |
| hyocholate                                  | Secondary Bile Acid Metabolism           | Lipid                  | 0.33          | 3.56E-02 | 1.40       | 1.02               | 1.91               |
| 1-stearoyl-2-oleoyl-GPS (18:0/18:1)         | Phosphatidylserine (PS)                  | Lipid                  | 0.50          | 3.66E-02 | 1.64       | 1.03               | 2.62               |
| trigonelline (N'-methylnicotinate)          | Nicotinate and Nicotinamide Metabolism   | Cofactors and Vitamins | -0.42         | 4.26E-02 | 0.66       | 0.44               | 0.99               |
| glutarate (C5-DC)                           | Fatty Acid, Dicarboxylate                | Lipid                  | 0.34          | 4.28E-02 | 1.41       | 1.01               | 1.96               |
| uridine                                     | Pyrimidine Metabolism, Uracil containing | Nucleotide             | 0.83          | 4.56E-02 | 2.28       | 1.02               | 5.13               |
| 1-palmitoyl-2-arachidonoyl-GPI (16:0/20:4)* | Phosphatidylinositol (PI)                | Lipid                  | 0.61          | 4.64E-02 | 1.85       | 1.01               | 3.38               |
| hydroxyasparagine                           | Alanine and Aspartate Metabolism         | Amino Acid             | 0.80          | 4.70E-02 | 2.23       | 1.01               | 4.92               |

| <b>Metabolite</b>                       | <b>Sub-pathway</b>        | <b>Super-pathway</b> | <b>Beta estimate</b> | <b>p-value</b> | <b>Odds ratio</b> | <b>95% CI lower bound</b> | <b>95% CI upper bound</b> |
|-----------------------------------------|---------------------------|----------------------|----------------------|----------------|-------------------|---------------------------|---------------------------|
| gamma-glutamyltryptophan                | Gamma-glutamyl Amino Acid | Peptide              | 0.45                 | 4.83E-02       | 1.56              | 1.00                      | 2.44                      |
| sphingomyelin (d18:2/24:1, d18:1/24:2)* | Sphingomyelins            | Lipid                | 0.88                 | 4.88E-02       | 2.42              | 1.00                      | 5.82                      |

\*: indicates a compound that has not been confirmed based on a standard, but we are confident in its identity.

Abbreviations: VDAART, Vitamin D Antenatal Asthma Reduction Trial.

**Supplementary Table S5.** Maternal third trimester (32–38 weeks gestation) metabolites with *p*-values < 0.05 for their associations with child asthma/recurrent wheeze status by age 3 in girls in VDAART (sorted by *p*-values)

| Metabolite                                     | Sub-pathway                           | Super-pathway          | Beta estimate | p-value  | Odds ratio | 95% CI lower bound | 95% CI upper bound |
|------------------------------------------------|---------------------------------------|------------------------|---------------|----------|------------|--------------------|--------------------|
| salicylate                                     | Drug - Topical Agents                 | Xenobiotics            | -1.04         | 3.38E-04 | 0.35       | 0.20               | 0.62               |
| 2-hydroxyhippurate (salicylurate)              | Benzoate Metabolism                   | Xenobiotics            | -0.77         | 4.28E-04 | 0.46       | 0.30               | 0.71               |
| N-acetyl-isoptureanine                         | Polyamine Metabolism                  | Amino Acid             | -1.18         | 4.35E-03 | 0.31       | 0.14               | 0.69               |
| N2,N2-dimethylguanosine                        | Purine Metabolism, Guanine containing | Nucleotide             | -1.34         | 4.83E-03 | 0.26       | 0.10               | 0.67               |
| hexadecenedioate (C16:1-DC)*                   | Fatty Acid, Dicarboxylate             | Lipid                  | 0.91          | 5.44E-03 | 2.48       | 1.31               | 4.72               |
| 1-stearoyl-2-docosahexaenoyl-GPE (18:0/22:6)*  | Phosphatidylethanolamine (PE)         | Lipid                  | -1.09         | 5.67E-03 | 0.34       | 0.16               | 0.73               |
| cysteinylglycine disulfide*                    | Glutathione Metabolism                | Amino Acid             | -1.07         | 6.87E-03 | 0.34       | 0.16               | 0.75               |
| 1,7-dimethylurate                              | Xanthine Metabolism                   | Xenobiotics            | -0.49         | 8.00E-03 | 0.61       | 0.43               | 0.88               |
| octadecadienedioate (C18:2-DC)*                | Fatty Acid, Dicarboxylate             | Lipid                  | 0.74          | 8.53E-03 | 2.10       | 1.21               | 3.65               |
| 2R,3R-dihydroxybutyrate                        | Fatty Acid, Dihydroxy                 | Lipid                  | -0.97         | 9.43E-03 | 0.38       | 0.18               | 0.79               |
| cys-gly, oxidized                              | Glutathione Metabolism                | Amino Acid             | -0.74         | 1.17E-02 | 0.48       | 0.27               | 0.85               |
| citramalate                                    | Glutamate Metabolism                  | Amino Acid             | -0.47         | 1.18E-02 | 0.62       | 0.43               | 0.90               |
| caffeine                                       | Xanthine Metabolism                   | Xenobiotics            | -0.43         | 1.20E-02 | 0.65       | 0.47               | 0.91               |
| beta-cryptoxanthin                             | Vitamin A Metabolism                  | Cofactors and Vitamins | 0.74          | 1.38E-02 | 2.10       | 1.16               | 3.79               |
| thyroxine                                      | Tyrosine Metabolism                   | Amino Acid             | 1.10          | 1.47E-02 | 3.01       | 1.24               | 7.30               |
| oxalate (ethanedioate)                         | Ascorbate and Aldarate Metabolism     | Cofactors and Vitamins | 1.09          | 1.67E-02 | 2.97       | 1.22               | 7.25               |
| AMP                                            | Purine Metabolism, Adenine containing | Nucleotide             | -0.72         | 1.76E-02 | 0.48       | 0.27               | 0.88               |
| succinylcarnitine (C4-DC)                      | TCA Cycle                             | Energy                 | -0.92         | 1.81E-02 | 0.40       | 0.19               | 0.85               |
| 7-methylguanine                                | Purine Metabolism, Guanine containing | Nucleotide             | -1.21         | 1.83E-02 | 0.30       | 0.11               | 0.82               |
| palmitoyl sphingomyelin (d18:1/16:0)           | Sphingomyelins                        | Lipid                  | 1.48          | 1.90E-02 | 4.40       | 1.28               | 15.15              |
| 1-palmitoyl-2-docosahexaenoyl-GPE (16:0/22:6)* | Phosphatidylethanolamine (PE)         | Lipid                  | -0.95         | 1.93E-02 | 0.39       | 0.17               | 0.86               |
| eicosanedioate (C20-DC)                        | Fatty Acid, Dicarboxylate             | Lipid                  | 0.71          | 2.00E-02 | 2.04       | 1.12               | 3.73               |

| Metabolite                             | Sub-pathway                                          | Super-pathway | Beta estimate | p-value  | Odds ratio | 95% CI lower bound | 95% CI upper bound |
|----------------------------------------|------------------------------------------------------|---------------|---------------|----------|------------|--------------------|--------------------|
| theophylline                           | Xanthine Metabolism                                  | Xenobiotics   | -0.42         | 2.11E-02 | 0.65       | 0.46               | 0.94               |
| mannose                                | Fructose, Mannose and Galactose Metabolism           | Carbohydrate  | 0.40          | 2.34E-02 | 1.49       | 1.06               | 2.09               |
| C-glycosyltryptophan                   | Tryptophan Metabolism                                | Amino Acid    | -1.08         | 2.39E-02 | 0.34       | 0.13               | 0.87               |
| 2-hydroxybehenate                      | Fatty Acid, Monohydroxy                              | Lipid         | 0.85          | 2.50E-02 | 2.33       | 1.11               | 4.88               |
| N-acetylcarnosine                      | Histidine Metabolism                                 | Amino Acid    | -0.49         | 2.50E-02 | 0.61       | 0.40               | 0.94               |
| cortisol                               | Corticosteroids                                      | Lipid         | -0.80         | 2.51E-02 | 0.45       | 0.22               | 0.90               |
| tetradecanedioate (C14)                | Fatty Acid, Dicarboxylate                            | Lipid         | 0.72          | 2.59E-02 | 2.04       | 1.09               | 3.84               |
| N-palmitoylglycine                     | Fatty Acid Metabolism (Acyl Glycine)                 | Lipid         | 0.64          | 2.67E-02 | 1.90       | 1.08               | 3.35               |
| 3-hydroxybutyrate (BHBA)               | Ketone Bodies                                        | Lipid         | 0.47          | 2.72E-02 | 1.61       | 1.05               | 2.45               |
| ADP                                    | Purine Metabolism, Adenine containing                | Nucleotide    | -0.48         | 2.76E-02 | 0.62       | 0.40               | 0.95               |
| N1-methylinosine                       | Purine Metabolism, (Hypo)Xanthine/Inosine containing | Nucleotide    | -0.81         | 2.78E-02 | 0.45       | 0.22               | 0.92               |
| sulfate*                               | Chemical                                             | Xenobiotics   | 1.18          | 3.18E-02 | 3.27       | 1.11               | 9.64               |
| glucose                                | Glycolysis, Gluconeogenesis, and Pyruvate Metabolism | Carbohydrate  | 0.38          | 3.58E-02 | 1.46       | 1.03               | 2.08               |
| cortolone glucuronide (1)              | Corticosteroids                                      | Lipid         | -0.54         | 3.87E-02 | 0.58       | 0.35               | 0.97               |
| 1,2-dilinoleoyl-GPC (18:2/18:2)        | Phosphatidylcholine (PC)                             | Lipid         | 0.92          | 3.87E-02 | 2.52       | 1.05               | 6.06               |
| sphingosine                            | Sphingosines                                         | Lipid         | -0.72         | 4.02E-02 | 0.48       | 0.24               | 0.97               |
| glutamate                              | Glutamate Metabolism                                 | Amino Acid    | -0.84         | 4.05E-02 | 0.43       | 0.19               | 0.96               |
| lignoceroyl sphingomyelin (d18:1/24:0) | Sphingomyelins                                       | Lipid         | 0.94          | 4.06E-02 | 2.55       | 1.04               | 6.25               |
| hexanoylglutamine                      | Fatty Acid Metabolism (Acyl Glutamine)               | Lipid         | 0.41          | 4.08E-02 | 1.51       | 1.02               | 2.24               |
| orotidine                              | Pyrimidine Metabolism, Orotate containing            | Nucleotide    | -0.80         | 4.12E-02 | 0.45       | 0.21               | 0.97               |
| phosphoethanolamine (PE)               | Phospholipid Metabolism                              | Lipid         | -0.56         | 4.12E-02 | 0.57       | 0.33               | 0.98               |
| creatinine                             | Creatine Metabolism                                  | Amino Acid    | -1.28         | 4.18E-02 | 0.28       | 0.08               | 0.95               |
| hexadecanedioate (C16)                 | Fatty Acid, Dicarboxylate                            | Lipid         | 0.67          | 4.20E-02 | 1.95       | 1.02               | 3.69               |

| <b>Metabolite</b>                          | <b>Sub-pathway</b>                                      | <b>Super-pathway</b>   | <b>Beta estimate</b> | <b>p-value</b> | <b>Odds ratio</b> | <b>95% CI lower bound</b> | <b>95% CI upper bound</b> |
|--------------------------------------------|---------------------------------------------------------|------------------------|----------------------|----------------|-------------------|---------------------------|---------------------------|
| kynurenine                                 | Tryptophan Metabolism                                   | Amino Acid             | -0.89                | 4.50E-02       | 0.41              | 0.17                      | 0.98                      |
| dihomo-linolenoylcarnitine (C20:3n3 or 6)* | Fatty Acid Metabolism (Acyl Carnitine, Polyunsaturated) | Lipid                  | -0.52                | 4.51E-02       | 0.60              | 0.36                      | 0.99                      |
| 2-hydroxylaurate                           | Fatty Acid, Monohydroxy                                 | Lipid                  | 0.84                 | 4.68E-02       | 2.31              | 1.01                      | 5.29                      |
| 2-hydroxyphenylacetate                     | Phenylalanine Metabolism                                | Amino Acid             | 0.53                 | 4.74E-02       | 1.70              | 1.01                      | 2.86                      |
| carotene diol (2)                          | Vitamin A Metabolism                                    | Cofactors and Vitamins | 0.75                 | 4.83E-02       | 2.11              | 1.01                      | 4.44                      |
| 2,3-dihydroxyisovalerate                   | Food Component/Plant                                    | Xenobiotics            | 0.35                 | 4.93E-02       | 1.42              | 1.00                      | 2.00                      |
| cortisone                                  | Corticosteroids                                         | Lipid                  | -0.71                | 4.94E-02       | 0.49              | 0.24                      | 1.00                      |

\*: indicates a compound that has not been confirmed based on a standard, but we are confident in its identity.

Abbreviations: VDAART, Vitamin D Antenatal Asthma Reduction Trial.

**Supplementary Table S6.** Maternal third trimester (32–38 weeks gestation) metabolites with *p*-values < 0.05 for their associations with child asthma/recurrent wheeze status by age 3 in boys in VDAART (sorted by *p*-values)

| Metabolite                                     | Sub-pathway                                          | Super-pathway          | Beta estimate | p-value  | Odds ratio | 95% CI lower bound | 95% CI upper bound |
|------------------------------------------------|------------------------------------------------------|------------------------|---------------|----------|------------|--------------------|--------------------|
| sphingomyelin (d18:2/24:2)*                    | Sphingomyelins                                       | Lipid                  | 1.33          | 1.33E-03 | 3.77       | 1.68               | 8.48               |
| 5,6-dihydrouridine                             | Pyrimidine Metabolism, Uracil containing             | Nucleotide             | 1.36          | 1.80E-03 | 3.91       | 1.66               | 9.21               |
| diacylglycerol (16:1/18:2 [2], 16:0/18:3 [1])* | Diacylglycerol                                       | Lipid                  | -0.49         | 2.35E-03 | 0.61       | 0.45               | 0.84               |
| cis-4-decenoate (10:1n6)*                      | Medium Chain Fatty Acid                              | Lipid                  | 0.73          | 2.44E-03 | 2.08       | 1.29               | 3.33               |
| N6-carbamoylthreonyladenosine                  | Purine Metabolism, Adenine containing                | Nucleotide             | 1.35          | 3.07E-03 | 3.84       | 1.58               | 9.38               |
| N-palmitoylglycine                             | Fatty Acid Metabolism (Acyl Glycine)                 | Lipid                  | 0.76          | 3.41E-03 | 2.13       | 1.28               | 3.53               |
| quinolinate                                    | Nicotinate and Nicotinamide Metabolism               | Cofactors and Vitamins | 0.92          | 3.88E-03 | 2.52       | 1.35               | 4.71               |
| pseudouridine                                  | Pyrimidine Metabolism, Uracil containing             | Nucleotide             | 1.38          | 4.08E-03 | 3.98       | 1.55               | 10.20              |
| sphingomyelin (d18:2/16:0, d18:1/16:1)*        | Sphingomyelins                                       | Lipid                  | 1.32          | 4.23E-03 | 3.73       | 1.51               | 9.20               |
| dodecanedioate (C12)                           | Fatty Acid, Dicarboxylate                            | Lipid                  | -0.66         | 4.41E-03 | 0.52       | 0.33               | 0.81               |
| sphingomyelin (d18:1/24:1, d18:2/24:0)*        | Sphingomyelins                                       | Lipid                  | 1.32          | 4.46E-03 | 3.75       | 1.51               | 9.32               |
| O-sulfo-L-tyrosine                             | Chemical                                             | Xenobiotics            | 0.97          | 4.58E-03 | 2.65       | 1.35               | 5.20               |
| 3-(3-amino-3-carboxypropyl)uridine*            | Pyrimidine Metabolism, Uracil containing             | Nucleotide             | 1.04          | 6.02E-03 | 2.83       | 1.35               | 5.94               |
| 2-hydroxypalmitate                             | Fatty Acid, Monohydroxy                              | Lipid                  | 0.92          | 6.51E-03 | 2.50       | 1.29               | 4.84               |
| sphingomyelin (d18:2/24:1, d18:1/24:2)*        | Sphingomyelins                                       | Lipid                  | 1.24          | 7.50E-03 | 3.44       | 1.39               | 8.51               |
| palmitoyl sphingomyelin (d18:1/16:0)           | Sphingomyelins                                       | Lipid                  | 1.36          | 9.48E-03 | 3.90       | 1.39               | 10.88              |
| 3-hydroxyhexanoate                             | Fatty Acid, Monohydroxy                              | Lipid                  | 0.72          | 9.70E-03 | 2.06       | 1.19               | 3.58               |
| 3-phosphoglycerate                             | Glycolysis, Gluconeogenesis, and Pyruvate Metabolism | Carbohydrate           | -0.65         | 1.05E-02 | 0.52       | 0.32               | 0.86               |
| aconitate [cis or trans]                       | TCA Cycle                                            | Energy                 | 1.37          | 1.05E-02 | 3.95       | 1.38               | 11.32              |

| Metabolite                                          | Sub-pathway                                          | Super-pathway          | Beta estimate | p-value  | Odds ratio | 95% CI lower bound | 95% CI upper bound |
|-----------------------------------------------------|------------------------------------------------------|------------------------|---------------|----------|------------|--------------------|--------------------|
| 2-stearoyl-GPE (18:0)*                              | Lysophospholipid                                     | Lipid                  | 0.79          | 1.21E-02 | 2.20       | 1.19               | 4.07               |
| octadecanedioate (C18)                              | Fatty Acid, Dicarboxylate                            | Lipid                  | 0.64          | 1.36E-02 | 1.90       | 1.14               | 3.15               |
| N4-acetylcytidine                                   | Pyrimidine Metabolism, Cytidine containing           | Nucleotide             | 0.65          | 1.37E-02 | 1.92       | 1.14               | 3.23               |
| tetradecadienoate (14:2)*                           | Long Chain Polyunsaturated Fatty Acid (n3 and n6)    | Lipid                  | 0.59          | 1.55E-02 | 1.81       | 1.12               | 2.93               |
| alliin                                              | Food Component/Plant                                 | Xenobiotics            | -0.38         | 1.57E-02 | 0.68       | 0.50               | 0.93               |
| hydroxyasparagine                                   | Alanine and Aspartate Metabolism                     | Amino Acid             | 0.95          | 1.75E-02 | 2.59       | 1.18               | 5.68               |
| hydroxyproline                                      | Urea cycle; Arginine and Proline Metabolism          | Amino Acid             | 0.84          | 1.95E-02 | 2.32       | 1.15               | 4.70               |
| dodecadienoate (12:2)*                              | Fatty Acid, Dicarboxylate                            | Lipid                  | 0.58          | 1.98E-02 | 1.79       | 1.10               | 2.93               |
| sphingomyelin (d18:1/22:2, d18:2/22:1, d16:1/24:2)* | Sphingomyelins                                       | Lipid                  | 0.93          | 2.03E-02 | 2.54       | 1.16               | 5.60               |
| 4-vinylphenol sulfate                               | Benzoate Metabolism                                  | Xenobiotics            | -0.40         | 2.60E-02 | 0.67       | 0.47               | 0.95               |
| sulfate*                                            | Chemical                                             | Xenobiotics            | 0.93          | 2.61E-02 | 2.53       | 1.12               | 5.72               |
| 2-hydroxystearate                                   | Fatty Acid, Monohydroxy                              | Lipid                  | 0.70          | 2.81E-02 | 2.02       | 1.08               | 3.77               |
| 5-methylthioadenosine (MTA)                         | Polyamine Metabolism                                 | Amino Acid             | 0.51          | 2.84E-02 | 1.66       | 1.06               | 2.62               |
| pregnenetriol disulfate*                            | Pregnenolone Steroids                                | Lipid                  | 0.58          | 2.92E-02 | 1.79       | 1.06               | 3.01               |
| 1-arachidonylglycerol (20:4)                        | Monoacylglycerol                                     | Lipid                  | 0.43          | 2.99E-02 | 1.54       | 1.04               | 2.27               |
| docosatrienoate (22:3n3)                            | Long Chain Polyunsaturated Fatty Acid (n3 and n6)    | Lipid                  | 0.47          | 3.20E-02 | 1.59       | 1.04               | 2.44               |
| heptanoate (7:0)                                    | Medium Chain Fatty Acid                              | Lipid                  | 0.77          | 3.26E-02 | 2.16       | 1.07               | 4.38               |
| retinol (Vitamin A)                                 | Vitamin A Metabolism                                 | Cofactors and Vitamins | -0.74         | 3.27E-02 | 0.48       | 0.24               | 0.94               |
| N-acetylalanine                                     | Alanine and Aspartate Metabolism                     | Amino Acid             | 0.99          | 3.30E-02 | 2.69       | 1.08               | 6.68               |
| urate                                               | Purine Metabolism, (Hypo)Xanthine/Inosine containing | Nucleotide             | 0.85          | 3.35E-02 | 2.34       | 1.07               | 5.12               |
| 1-oleoyl-2-docosahexaenoyl-GPC (18:1/22:6)*         | Phosphatidylcholine (PC)                             | Lipid                  | -0.81         | 3.78E-02 | 0.45       | 0.21               | 0.96               |
| oleate/vaccenate (18:1)                             | Long Chain Monounsaturated Fatty Acid                | Lipid                  | 0.49          | 3.95E-02 | 1.63       | 1.02               | 2.58               |



| <b>Metabolite</b>                               | <b>Sub-pathway</b>                                      | <b>Super-pathway</b> | <b>Beta estimate</b> | <b>p-value</b> | <b>Odds ratio</b> | <b>95% CI lower bound</b> | <b>95% CI upper bound</b> |
|-------------------------------------------------|---------------------------------------------------------|----------------------|----------------------|----------------|-------------------|---------------------------|---------------------------|
| 2-hydroxybutyrate/2-hydroxyisobutyrate          | Glutathione Metabolism                                  | Amino Acid           | 0.62                 | 4.00E-02       | 1.86              | 1.03                      | 3.36                      |
| hydroxypalmitoyl sphingomyelin (d18:1/16:0(OH)) | Sphingomyelins                                          | Lipid                | 0.79                 | 4.11E-02       | 2.19              | 1.03                      | 4.66                      |
| 7-HOCA                                          | Sterol                                                  | Lipid                | 0.71                 | 4.17E-02       | 2.04              | 1.03                      | 4.03                      |
| cis-4-decenoylcarnitine (C10:1)                 | Fatty Acid Metabolism (Acyl Carnitine, Monounsaturated) | Lipid                | 0.50                 | 4.25E-02       | 1.65              | 1.02                      | 2.67                      |
| linoleate (18:2n6)                              | Long Chain Polyunsaturated Fatty Acid (n3 and n6)       | Lipid                | 0.48                 | 4.56E-02       | 1.61              | 1.01                      | 2.58                      |
| dihomolinoleate (20:2n6)                        | Long Chain Polyunsaturated Fatty Acid (n3 and n6)       | Lipid                | 0.52                 | 5.00E-02       | 1.69              | 1.00                      | 2.85                      |

\*: indicates a compound that has not been confirmed based on a standard, but we are confident in its identity.

Abbreviations: VDAART, Vitamin D Antenatal Asthma Reduction Trial.

**Supplementary Table S7.** Maternal baseline (10–18 weeks gestation) metabolites with *p*-values < 0.05 for their interaction with child sex in association with child asthma/recurrent wheeze status by age 3 in VDAART (sorted by interaction term *p*-values)

| Metabolite                                          | Sub-pathway                                      | Super-pathway          | Beta estimate | Interaction term p-value |
|-----------------------------------------------------|--------------------------------------------------|------------------------|---------------|--------------------------|
| thioprolin                                          | Chemical                                         | Xenobiotics            | 1.72          | 2.58E-03                 |
| kynurenine                                          | Tryptophan Metabolism                            | Amino Acid             | 1.63          | 4.22E-03                 |
| 3-methylxanthine                                    | Xanthine Metabolism                              | Xenobiotics            | 0.68          | 6.19E-03                 |
| theobromine                                         | Xanthine Metabolism                              | Xenobiotics            | 0.47          | 7.72E-03                 |
| glyco-beta-muricholate                              | Primary Bile Acid Metabolism                     | Lipid                  | -0.67         | 1.01E-02                 |
| pseudouridine                                       | Pyrimidine Metabolism, Uracil containing         | Nucleotide             | 1.72          | 1.04E-02                 |
| 1-palmitoyl-2-palmitoleoyl-GPC (16:0/16:1)*         | Phosphatidylcholine (PC)                         | Lipid                  | 1.04          | 1.08E-02                 |
| N-oleoylserine                                      | Endocannabinoid                                  | Lipid                  | -1.02         | 1.43E-02                 |
| gulonate*                                           | Ascorbate and Aldarate Metabolism                | Cofactors and Vitamins | 0.58          | 1.56E-02                 |
| cysteinylglycine disulfide*                         | Glutathione Metabolism                           | Amino Acid             | 1.23          | 1.56E-02                 |
| 1-stearoyl-2-oleoyl-GPS (18:0/18:1)                 | Phosphatidylserine (PS)                          | Lipid                  | 0.79          | 1.72E-02                 |
| cysteine                                            | Methionine, Cysteine, SAM and Taurine Metabolism | Amino Acid             | 1.01          | 1.98E-02                 |
| 1-(1-enyl-palmitoyl)-2-linoleoyl-GPC (P-16:0/18:2)* | Plasmalogen                                      | Lipid                  | -1.28         | 2.25E-02                 |
| 5alpha-pregnan-3beta,20beta-diol monosulfate (1)    | Progestin Steroids                               | Lipid                  | -1.96         | 2.29E-02                 |
| isoursodeoxycholate                                 | Secondary Bile Acid Metabolism                   | Lipid                  | -0.56         | 2.42E-02                 |
| 3-amino-2-piperidone                                | Urea cycle; Arginine and Proline Metabolism      | Amino Acid             | -0.85         | 2.58E-02                 |
| hexadecenedioate (C16:1-DC)*                        | Fatty Acid, Dicarboxylate                        | Lipid                  | -0.78         | 2.66E-02                 |
| hydroxy-N6,N6,N6-trimethyllysine*                   | Lysine Metabolism                                | Amino Acid             | 0.75          | 3.05E-02                 |
| 1-(1-enyl-palmitoyl)-GPC (P-16:0)*                  | Lysoplasmalogen                                  | Lipid                  | -0.93         | 3.06E-02                 |
| taurolithocholate 3-sulfate                         | Secondary Bile Acid Metabolism                   | Lipid                  | -0.61         | 3.65E-02                 |
| cysteinylglycine                                    | Glutathione Metabolism                           | Amino Acid             | 0.60          | 3.82E-02                 |
| C-glycosyltryptophan                                | Tryptophan Metabolism                            | Amino Acid             | 1.18          | 4.01E-02                 |
| 3beta-hydroxy-5-cholestenoate                       | Sterol                                           | Lipid                  | -0.94         | 4.10E-02                 |
| 12,13-DiHOME                                        | Fatty Acid, Dihydroxy                            | Lipid                  | -0.57         | 4.22E-02                 |

| <b>Metabolite</b> | <b>Sub-pathway</b>  | <b>Super-pathway</b> | <b>Beta estimate</b> | <b>Interaction term p-value</b> |
|-------------------|---------------------|----------------------|----------------------|---------------------------------|
| maltotriose       | Glycogen Metabolism | Carbohydrate         | 0.38                 | 4.47E-02                        |
| maltose           | Glycogen Metabolism | Carbohydrate         | 0.45                 | 4.75E-02                        |

\*: indicates a compound that has not been confirmed based on a standard, but we are confident in its identity.

**Supplementary Table S8.** Maternal third trimester (32–38 weeks gestation) metabolites with  $p$ -values < 0.05 for their interaction with child sex in association with child asthma/recurrent wheeze status by age 3 in VDAART (sorted by interaction term  $p$ -values)

| Metabolite                                    | Sub-pathway                                          | Super-pathway          | Beta estimate | Interaction term $p$ -value |
|-----------------------------------------------|------------------------------------------------------|------------------------|---------------|-----------------------------|
| quinolinate                                   | Nicotinate and Nicotinamide Metabolism               | Cofactors and Vitamins | 1.58          | 2.53E-04                    |
| 2-hydroxyhippurate (salicylurate)             | Benzoate Metabolism                                  | Xenobiotics            | 0.83          | 9.79E-04                    |
| salicylate                                    | Drug - Topical Agents                                | Xenobiotics            | 1.03          | 1.85E-03                    |
| 3-(3-amino-3-carboxypropyl)uridine*           | Pyrimidine Metabolism, Uracil containing             | Nucleotide             | 1.46          | 2.77E-03                    |
| C-glycosyltryptophan                          | Tryptophan Metabolism                                | Amino Acid             | 1.68          | 5.20E-03                    |
| 5,6-dihydrouridine                            | Pyrimidine Metabolism, Uracil containing             | Nucleotide             | 1.77          | 5.78E-03                    |
| kynurenine                                    | Tryptophan Metabolism                                | Amino Acid             | 1.50          | 6.25E-03                    |
| N2,N2-dimethylguanosine                       | Purine Metabolism, Guanine containing                | Nucleotide             | 1.60          | 7.16E-03                    |
| 1-stearoyl-2-docosahexaenoyl-GPE (18:0/22:6)* | Phosphatidylethanolamine (PE)                        | Lipid                  | 1.32          | 7.47E-03                    |
| N6-carbamoylthreonyladenosine                 | Purine Metabolism, Adenine containing                | Nucleotide             | 1.70          | 7.68E-03                    |
| hexadecenedioate (C16:1-DC)*                  | Fatty Acid, Dicarboxylate                            | Lipid                  | -0.98         | 9.96E-03                    |
| aconitate [cis or trans]                      | TCA Cycle                                            | Energy                 | 1.58          | 1.13E-02                    |
| pseudouridine                                 | Pyrimidine Metabolism, Uracil containing             | Nucleotide             | 1.67          | 1.30E-02                    |
| ADP                                           | Purine Metabolism, Adenine containing                | Nucleotide             | 0.71          | 1.35E-02                    |
| 3-methylxanthine                              | Xanthine Metabolism                                  | Xenobiotics            | 0.53          | 1.41E-02                    |
| sphingadienine                                | Sphingolipid Synthesis                               | Lipid                  | 0.94          | 1.56E-02                    |
| 7-methylguanine                               | Purine Metabolism, Guanine containing                | Nucleotide             | 1.57          | 1.56E-02                    |
| 1,7-dimethylurate                             | Xanthine Metabolism                                  | Xenobiotics            | 0.53          | 1.67E-02                    |
| hydroxyasparagine                             | Alanine and Aspartate Metabolism                     | Amino Acid             | 1.44          | 1.73E-02                    |
| urate                                         | Purine Metabolism, (Hypo)Xanthine/Inosine containing | Nucleotide             | 1.42          | 1.77E-02                    |
| phosphoethanolamine (PE)                      | Phospholipid Metabolism                              | Lipid                  | 0.81          | 2.06E-02                    |
| beta-cryptoxanthin                            | Vitamin A Metabolism                                 | Cofactors and Vitamins | -0.82         | 2.08E-02                    |
| 2-hydroxylaurate                              | Fatty Acid, Monohydroxy                              | Lipid                  | -1.15         | 2.22E-02                    |
| caffeine                                      | Xanthine Metabolism                                  | Xenobiotics            | 0.46          | 2.27E-02                    |

| Metabolite                                     | Sub-pathway                                             | Super-pathway          | Beta estimate | Interaction term p-value |
|------------------------------------------------|---------------------------------------------------------|------------------------|---------------|--------------------------|
| N-acetylneuraminate                            | Aminosugar Metabolism                                   | Carbohydrate           | 1.10          | 2.27E-02                 |
| orotidine                                      | Pyrimidine Metabolism, Orotate containing               | Nucleotide             | 1.15          | 2.36E-02                 |
| eicosenedioate (C20:1-DC)*                     | Fatty Acid, Dicarboxylate                               | Lipid                  | -0.84         | 2.40E-02                 |
| kynurenate                                     | Tryptophan Metabolism                                   | Amino Acid             | 1.01          | 2.62E-02                 |
| cortolone glucuronide (1)                      | Corticosteroids                                         | Lipid                  | 0.75          | 2.71E-02                 |
| sphingosine                                    | Sphingosines                                            | Lipid                  | 0.97          | 2.72E-02                 |
| N4-acetylcytidine                              | Pyrimidine Metabolism, Cytidine containing              | Nucleotide             | 0.80          | 2.95E-02                 |
| dodecanedioate (C12)                           | Fatty Acid, Dicarboxylate                               | Lipid                  | -0.68         | 3.28E-02                 |
| theophylline                                   | Xanthine Metabolism                                     | Xenobiotics            | 0.48          | 3.33E-02                 |
| 1-palmitoyl-2-docosahexaenoyl-GPE (16:0/22:6)* | Phosphatidylethanolamine (PE)                           | Lipid                  | 1.03          | 3.51E-02                 |
| palmitoleoylcarnitine (C16:1)*                 | Fatty Acid Metabolism (Acyl Carnitine, Monounsaturated) | Lipid                  | 0.77          | 3.55E-02                 |
| N-acetyltryptophan                             | Tryptophan Metabolism                                   | Amino Acid             | 0.59          | 3.70E-02                 |
| creatinine                                     | Creatine Metabolism                                     | Amino Acid             | 1.58          | 3.73E-02                 |
| theobromine                                    | Xanthine Metabolism                                     | Xenobiotics            | 0.47          | 3.76E-02                 |
| dihomo-linolenoylcarnitine (C20:3n3 or 6)*     | Fatty Acid Metabolism (Acyl Carnitine, Polyunsaturated) | Lipid                  | 0.68          | 3.96E-02                 |
| vanillylmandelate (VMA)                        | Tyrosine Metabolism                                     | Amino Acid             | 0.82          | 3.96E-02                 |
| octadecadienedioate (C18:2-DC)*                | Fatty Acid, Dicarboxylate                               | Lipid                  | -0.69         | 4.08E-02                 |
| 1-arachidonylglycerol (20:4)                   | Monoacylglycerol                                        | Lipid                  | 0.56          | 4.15E-02                 |
| pyridoxate                                     | Vitamin B6 Metabolism                                   | Cofactors and Vitamins | -0.61         | 4.18E-02                 |
| docosatrienoate (22:3n3)                       | Long Chain Polyunsaturated Fatty Acid (n3 and n6)       | Lipid                  | 0.62          | 4.34E-02                 |
| gamma-glutamylhistidine                        | Gamma-glutamyl Amino Acid                               | Peptide                | 0.89          | 4.36E-02                 |
| carotene diol (3)                              | Vitamin A Metabolism                                    | Cofactors and Vitamins | -0.85         | 4.47E-02                 |

\*: indicates a compound that has not been confirmed based on a standard, but we are confident in its identity.

## **Metabolomic profiling in the Vitamin D Antenatal Asthma Reduction Trial (VDAART)**

### *Metabolon ultrahigh-performance liquid chromatography (UPLC) – tandem mass spectrometry (MS/MS) platform method [1]*

Sample Preparation: Samples were prepared using the automated MicroLab STAR® system from Hamilton Company. Several recovery standards were added prior to the first step in the extraction process for QC purposes. To remove protein, dissociate small molecules bound to protein or trapped in the precipitated protein matrix, and to recover chemically diverse metabolites, proteins were precipitated with methanol under vigorous shaking for 2 min (Glen Mills GenoGrinder 2000) followed by centrifugation. The resulting extract was divided into five fractions: two for analysis by two separate reverse phase (RP)/UPLC-MS/MS methods with positive ion mode electrospray ionization (ESI), one for analysis by RP/UPLC-MS/MS with negative ion mode ESI, one for analysis by HILIC/UPLC-MS/MS with negative ion mode ESI, and one sample was reserved for backup. Samples were placed briefly on a TurboVap® (Zymark) to remove the organic solvent. The sample extracts were stored overnight under nitrogen before preparation for analysis.

QA/QC: Several types of controls were analyzed in concert with the experimental samples: a well-characterized, pooled matrix sample generated from a representative, large number of individuals served as a technical replicate throughout the data set; extracted water samples served as process blanks; and a cocktail of QC standards that were carefully chosen not to interfere with the measurement of endogenous compounds were spiked into every analyzed sample to allow instrument performance monitoring and aid in chromatographic alignment. Instrument variability was determined by calculating the median relative standard deviation (RSD) for the standards that were added to each sample prior to injection into the mass spectrometers. Overall process variability was determined by calculating the median RSD for all endogenous metabolites (i.e., non-instrument standards) present in 100% of the pooled matrix samples. Experimental samples were randomized across the platform run with QC samples spaced evenly among the injections.

Ultrahigh Performance Liquid Chromatography – Tandem Mass Spectrometry (UPLC-MS/MS): All methods utilized a Waters ACQUITY ultra-performance liquid chromatography (UPLC) and a Thermo Scientific Q-Exactive high resolution/accurate mass spectrometer interfaced with a heated electrospray ionization (HESI-II) source and Orbitrap mass analyzer operated at 35,000 mass resolution. The sample extract was dried then reconstituted in solvents compatible to each of the four methods. Each reconstitution solvent contained a series of standards at fixed concentrations to ensure injection and chromatographic consistency. One aliquot was analyzed using acidic positive ion conditions, chromatographically optimized for more hydrophilic compounds. In this method, the extract was gradient eluted from a C18 column (Waters UPLC BEH C18-2.1x100 mm, 1.7 µm) using water and methanol, containing 0.05% perfluoropentanoic acid (PFPA) and 0.1% formic acid (FA). Another aliquot was also analyzed using acidic positive ion conditions, however it was chromatographically optimized for more hydrophobic compounds. In this method, the extract was gradient eluted from the same afore mentioned C18 column using methanol, acetonitrile, water, 0.05% PFPA and 0.01% FA and was operated at an overall higher organic content. Another aliquot was analyzed using basic negative ion optimized conditions using a separate dedicated C18 column. The basic extracts were gradient eluted from the column using methanol and water, however with 6.5 mM Ammonium Bicarbonate at pH 8. The fourth aliquot was analyzed via negative ionization following elution from a HILIC column (Waters UPLC BEH Amide 2.1x150 mm, 1.7 µm) using a gradient consisting of water and acetonitrile with 10mM Ammonium Formate, pH 10.8. The MS analysis alternated between MS and data-dependent MS<sub>n</sub> scans using dynamic exclusion. The scan range varied slightly between methods but covered 70-1000 m/z. Raw data files were archived and extracted as described below.

Data Extraction and Compound Identification: Raw data was extracted, peak-identified and QC processed using Metabolon's hardware and software. These systems are built on a web-service platform utilizing Microsoft's .NET technologies, which run on high-performance application servers and fiber-channel storage arrays in clusters to provide active failover and load-balancing. Compounds were identified by comparison to library entries of purified standards or recurrent unknown entities. Metabolon maintains a library based on authenticated standards that contains the retention time/index (RI), mass to charge ratio (m/z), and chromatographic data (including MS/MS spectral data) on all molecules present in the library. Furthermore, biochemical identifications are based on three criteria: retention index within a narrow RI window of the proposed identification, accurate mass match to the library +/- 10 ppm, and the MS/MS forward and reverse scores between the experimental data and authentic standards. The MS/MS scores are based on a comparison of the ions present in the experimental spectrum to the ions present in the library spectrum. While there may be similarities between these molecules based on one of these factors, the use of all three data points can be utilized to distinguish and differentiate biochemicals. More than 4,500 commercially available purified standard compounds have been acquired and registered into LIMS for analysis on all platforms for determination of their analytical characteristics. Additional mass spectral entries have been created for structurally unnamed biochemicals, which have been identified by virtue of their recurrent nature (both chromatographic and mass spectral). These compounds have the potential to be identified by future acquisition of a matching purified standard or by classical structural analysis.

Curation: A variety of curation procedures were carried out to ensure that a high quality data set was made available for statistical analysis and data interpretation. The QC and curation processes were designed to ensure accurate and consistent identification of true chemical entities, and to remove those representing system artifacts, mis-assignments, and background noise. Metabolon data analysts use proprietary visualization and interpretation software to confirm the consistency of peak identification among the various samples. Library matches for each compound were checked for each sample and corrected if necessary.

Metabolite Quantification and Data Normalization: Peaks were quantified using area-under-the-curve. A data normalization step was performed to correct variation resulting from instrument inter-day tuning differences by registering the medians to equal one and normalizing each data point proportionately. For this study, two distinct sample sets were merged that contained disparity in the proportions of control group composition, precluding run day normalization. Accordingly, datasets were merged by setting the medians of the control groups in the two datasets to be equal. Because sampling was kept consistent across both sample sets, this mitigates concerns that this approach artificially decreases the variance of this control group by forcing the medians to be equal.

#### Data processing pipeline

We calculated missingness across each metabolite and each sample. Metabolites missing  $\geq 75\%$  were excluded. Missing values were imputed as half the minimum value across all samples for each metabolite. We examined the resulting plots of principal component analysis (PCA). Interquartile range (IQR) and skewness of each metabolite were also computed. All metabolites were subsequently log-10 transformed and *pareto*-scaled, and IQR and skewness were re-calculated after transformation. PCA was performed again, and distribution of PCs according to demographic variables were examined.

## References

1. Evans, A.M.; DeHaven, C.D.; Barrett, T.; Mitchell, M.; Milgram, E. Integrated, nontargeted ultrahigh performance liquid chromatography/electrospray ionization tandem mass spectrometry platform for the identification and relative quantification of the small-molecule complement of biological systems. *Anal Chem* **2009**, *81*, 6656-6667, doi:10.1021/ac901536h.
